# Supplementary material for: MCDA-based deliberation to value health states: lessons learned from a pilot study
Source: Springer Nature journal article supplement (doi:10.1186/s12955-019-1189-7), 2019-07-01
Supplement: MOESM2 [file 16872034]

## Additional file 2 Answers to the closed questions of the evaluative questionnaire

**Additional table 1** Results of the evaluative questions about the conference procedure

|                                                                                           | Strongly disagree |        | Disagree |        | Neutral |        | Agree |        | Strongly agree |        |
|-------------------------------------------------------------------------------------------|-------------------|--------|----------|--------|---------|--------|-------|--------|----------------|--------|
|                                                                                           | n                 | %      | n        | %      | n       | %      | n     | %      | n              | %      |
| <b>I was able to introduce my perspective into the discussion.</b>                        | 0                 | 0.0 %  | 1        | 4.2 %  | 4       | 16.7 % | 9     | 37.5 % | 10             | 41.7 % |
| <b>Participants responded to statements of others.</b>                                    | 0                 | 0.0 %  | 0        | 0.0 %  | 5       | 20.8 % | 13    | 54.2 % | 6              | 25.0 % |
| <b>Participants interrupted each other often.</b>                                         | 11                | 45.8 % | 11       | 45.8 % | 2       | 8.3 %  | 0     | 0.0 %  | 0              | 0.0 %  |
| <b>Participants constructively worked towards achieving consensus.</b>                    | 0                 | 0.0 %  | 3        | 12.5 % | 4       | 16.7 % | 13    | 54.2 % | 4              | 16.7 % |
| <b>I am satisfied with the result achieved in the small group session.</b>                | 0                 | 0.0 %  | 0        | 0.0 %  | 2       | 8.3 %  | 3     | 12.5 % | 19             | 79.2 % |
| <b>I am satisfied with the result achieved in the plenary session.</b>                    | 1                 | 4.2 %  | 11       | 45.8 % | 4       | 16.7 % | 6     | 25.0 % | 2              | 8.3 %  |
| <b>The provided information was understandable and helpful.</b>                           | 0                 | 0.0 %  | 1        | 4.2 %  | 4       | 16.7 % | 7     | 29.2 % | 12             | 50.0 % |
| <b>After the introduction, content and objectives of the conference were clear to me.</b> | 0                 | 0.0 %  | 3        | 12.5 % | 1       | 4.2 %  | 11    | 45.8 % | 9              | 37.5 % |
| <b>There was sufficient room for questions.</b>                                           | 1                 | 4.2 %  | 0        | 0.0 %  | 0       | 0.0 %  | 6     | 25.0 % | 17             | 70.8 % |

**Additional table 2** Results of the questions on the Perspective Taking Scale

|                                                                                                              | Does not describe me well |        | Rather does not describe me well |        | Neutral |        | Describes me rather well |        | Describes me well |        |
|--------------------------------------------------------------------------------------------------------------|---------------------------|--------|----------------------------------|--------|---------|--------|--------------------------|--------|-------------------|--------|
|                                                                                                              | n                         | %      | n                                | %      | n       | %      | n                        | %      | n                 | %      |
| <b>Before criticizing somebody, I try to imagine how I would feel if I were in their place.</b>              | 0                         | 0.0 %  | 1                                | 4.2 %  | 8       | 33.3 % | 5                        | 20.8 % | 10                | 41.7 % |
| <b>If I'm sure I'm right about something, I don't waste much time listening to other people's arguments.</b> | 3                         | 12.5 % | 12                               | 50.0 % | 4       | 16.7 % | 5                        | 20.8 % | 0                 | 0.0 %  |
| <b>I sometimes try to understand my fellows better by imagining how things look from their perspective.</b>  | 0                         | 0.0 %  | 3                                | 12.5 % | 2       | 8.3 %  | 10                       | 41.7 % | 9                 | 37.5 % |
| <b>I believe that there are two sides to every question and try to look at them both.</b>                    | 1                         | 4.2 %  | 2                                | 8.3 %  | 4       | 16.7 % | 12                       | 50.0 % | 5                 | 20.8 % |
| <b>I sometimes find it difficult to see things from the "other guy's" point of view.</b>                     | 2                         | 8.3 %  | 8                                | 33.3 % | 5       | 20.8 % | 6                        | 25.0 % | 3                 | 12.5 % |
| <b>I try to look at everybody's side of a disagreement before I make a decision.</b>                         | 0                         | 0.0 %  | 3                                | 12.5 % | 1       | 4.2 %  | 9                        | 37.5 % | 11                | 45.8 % |
| <b>When I'm upset at someone, I usually try to "put myself in his shoes" for a while.</b>                    | 1                         | 4.2 %  | 7                                | 29.2 % | 8       | 33.3 % | 7                        | 29.2 % | 1                 | 4.2 %  |
