# Supplementary material for: MCDA-based deliberation to value health states: lessons learned from a pilot study
Source: Springer Nature journal article supplement (doi:10.1186/s12955-019-1189-7), 2019-07-01
Supplement: MOESM3 [file 16872034]

## **Additional file 3** Complete coding frame with number of codings in each subcategory

### **1 Aspects of procedure evaluated**

|                                      |    |
|--------------------------------------|----|
| 1.1 Exhaustion or excessive demand   | 14 |
| 1.2 Insecurity about procedure       | 9  |
| 1.3 Insecurity about topic           | 5  |
| 1.4 Size of plenary assembly         | 8  |
| 1.5 Time management                  | 8  |
| 1.6 Organizational issues            | 8  |
| 1.7 Questioning work of small groups | 13 |
| 1.8 Missing information              | 10 |
| 1.9 Other                            | 6  |

### **2 Aspects of methodology evaluated**

|                                     |    |
|-------------------------------------|----|
| 2.1 Understanding                   | 15 |
| 2.2 Independence of dimensions      | 6  |
| 2.3 Trade-off between dimensions    | 9  |
| 2.4 Abstraction from personal level | 7  |
| 2.5 Finding consensus               | 10 |
| 2.6 Unclear definitions             | 29 |
| 2.7 Other                           | 4  |

### **3 Aspects of participants' behavior evaluated**

|                                     |    |
|-------------------------------------|----|
| 3.1 Conversational atmosphere       | 17 |
| 3.2 Interaction                     | 13 |
| 3.3 Balanced participation          | 3  |
| 3.4 Unbalanced participation        | 17 |
| 3.5 Willingness to find consensus   | 17 |
| 3.6 Unwillingness to find consensus | 10 |
| 3.7 Moderation                      | 6  |
| 3.8 Other                           | 6  |

### **4 Aspects of research approach evaluated**

|                                     |    |
|-------------------------------------|----|
| 4.1 Complexity of research question | 8  |
| 4.2 Assumptions and implementation  | 6  |
| 4.3 Influencing results             | 8  |
| 4.4 Ethical concerns                | 11 |
| 4.5 Ethical acceptability           | 3  |
| 4.6 Practical application           | 6  |
| 4.7 Other                           | 0  |

### **5 Suggestions for improvement**

|                                  |   |
|----------------------------------|---|
| 5.1 Information for participants | 6 |
| 5.2 Approach for weighting       | 3 |

|                           |    |
|---------------------------|----|
| 5.3 Procedure for scoring | 15 |
| 5.4 Group organization    | 4  |
| 5.5 Time management       | 3  |
| 5.6 Other                 | 1  |

## **6 Reasons for evaluation of difference in attractiveness**

|                                    |    |
|------------------------------------|----|
| 6.1 Intuition                      | 5  |
| 6.2 Expectations of society        | 9  |
| 6.3 Self-expectation               | 10 |
| 6.4 Satisfaction                   | 10 |
| 6.5 Tolerance or Adjustment        | 15 |
| 6.6 Marginal benefit               | 21 |
| 6.7 Level of impairment            | 23 |
| 6.8 Needs                          | 5  |
| 6.9 Autonomy or self-determination | 23 |
| 6.10 Evaluation of an example      | 18 |
| 6.11 Unclear                       | 8  |
| 6.12 Other reasons                 | 4  |

## **7 Dimensions which should have greater weight**

|                          |   |
|--------------------------|---|
| 7.1 None                 | 8 |
| 7.2 Physical functioning | 1 |
| 7.3 Role limitation      | 1 |
| 7.4 Social functioning   | 0 |
| 7.5 Pain                 | 5 |
| 7.6 Mental Health        | 4 |
| 7.7 Vitality             | 0 |

## **8 Dimensions which should have smaller weight**

|                          |   |
|--------------------------|---|
| 8.1 Physical functioning | 1 |
| 8.2 Role limitation      | 1 |
| 8.3 Social functioning   | 0 |
| 8.4 Pain                 | 0 |
| 8.5 Mental Health        | 0 |
| 8.6 Vitality             | 3 |

## **9 Difference in attractiveness**

|                   |   |
|-------------------|---|
| 9.1 No difference | 1 |
| 9.2 Very weak     | 4 |
| 9.3 Weak          | 4 |
| 9.4 Moderate      | 3 |
| 9.5 Strong        | 2 |
| 9.6 Very strong   | 8 |
| 9.7 Extreme       | 4 |
